# Supplementary material for: Engineering a MOF–magnetic graphene oxide nanocomposite for enantioselective capture
Source: Royal Society of Chemistry journal article supplement (doi:10.1039/c8ay01876f), 2018-01-01
Supplement: c8ay01876f1.pdf [file c8ay01876f1.pdf]

# Supporting information

## **Engineering MOF-magnetic graphene oxide nanocomposite for enantioselective capture**

Yu Gao,<sup>a</sup> Wenrui Du,<sup>a</sup> Ajuan Yu,<sup>\*a</sup> Xinglin Li,<sup>a</sup> Wuduo Zhao,<sup>b</sup> Shusheng Zhang<sup>b</sup>

<sup>a</sup> College of Chemistry and Molecular Engineering, Key Laboratory of Molecular Sensing and Harmful Substances Detection Technology, Zhengzhou University, Kexue Avenue 100, Zhengzhou, Henan 450001, P. R. China.

<sup>b</sup> Center of Advanced Analysis and Computational Science, Key Laboratory of Molecular Sensing and Harmful Substances Detection Technology, Zhengzhou University, Kexue Avenue 100, Zhengzhou, Henan 450001, P. R. China.

### **Contents:**

#### **Section 1. Experimental section**

#### **Section 2. Figures S1-S3**

## Supplement of Experimental section

**Synthesis of MOF  $[\text{Zn}_2(\text{BTC})(\text{NO}_3)(\text{DMA})_3]_n$  (ZnBND).**  $\text{Zn}(\text{NO}_3)_2 \cdot 6\text{H}_2\text{O}$  (1.368 g) and  $\text{H}_3\text{BTC}$  (0.3192 g) and DMA (23 mL) were mixed in a 100 mL three-necked round-bottomed flask. The mixture was heated in oil-bath at 110 °C for 60 h with mechanical agitation. Then colorless powder were collected, washed with ultrapure water and ethanol, and dried in vacuum oven to obtain the MOF (ZnBND).

**Synthesis of  $\text{Fe}_3\text{O}_4@\text{SiO}_2@\text{ZnBND}$  composite.** 7 Wt % of  $\text{Fe}_3\text{O}_4@\text{SiO}_2$  were added into the mixed DMA of  $\text{Zn}(\text{NO}_3)_2 \cdot 6\text{H}_2\text{O}$  (1.368 g) and  $\text{H}_3\text{BTC}$  (0.3192 g). The suspension was sonicated for 30 min, and then heated in oil-bath at 110 °C for 60 h with mechanical agitation. Dark gray powder were collected, washed with ultrapure water and ethanol, and dried in vacuum oven to get the  $\text{Fe}_3\text{O}_4@\text{SiO}_2@\text{ZnBND}$ .

**Synthesis of  $\text{Fe}_3\text{O}_4@\text{SiO}_2\text{-NH}_2@\text{ZnBND}$  composite.** Same to the above synthetic step, 7 wt % of  $\text{Fe}_3\text{O}_4@\text{SiO}_2\text{-NH}_2$  were added, and then gray powder  $\text{Fe}_3\text{O}_4@\text{SiO}_2\text{-NH}_2@\text{ZnBND}$  was gained.

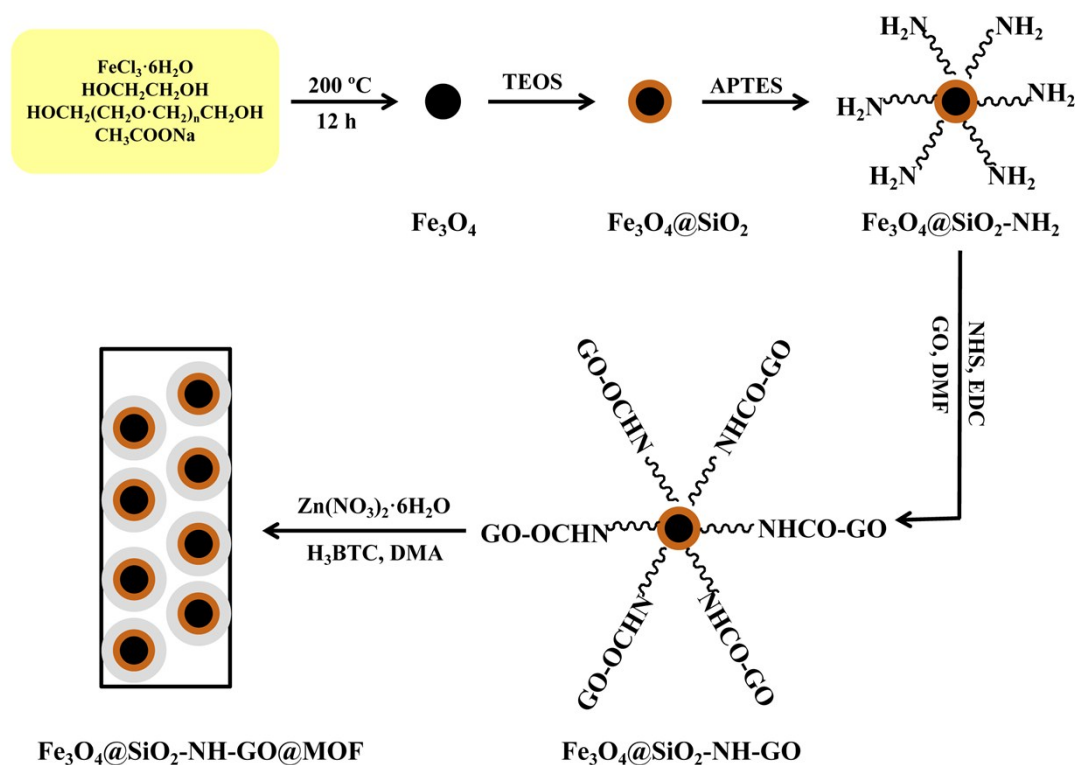

**Figure S1.** Preparation of  $\text{Fe}_3\text{O}_4@\text{SiO}_2\text{-NH}_2@\text{ZnBND}$ (MGO-ZnBND)

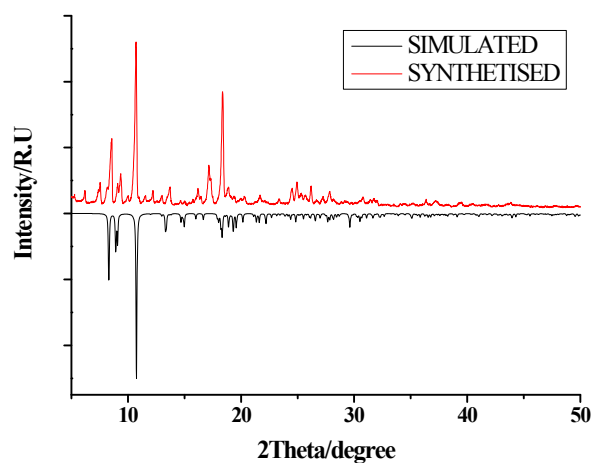

**Figure S2.** The experimental powder X-ray diffractogram of as-synthesised ZnBND (normal plot) and corresponding simulation result (inverted plot).

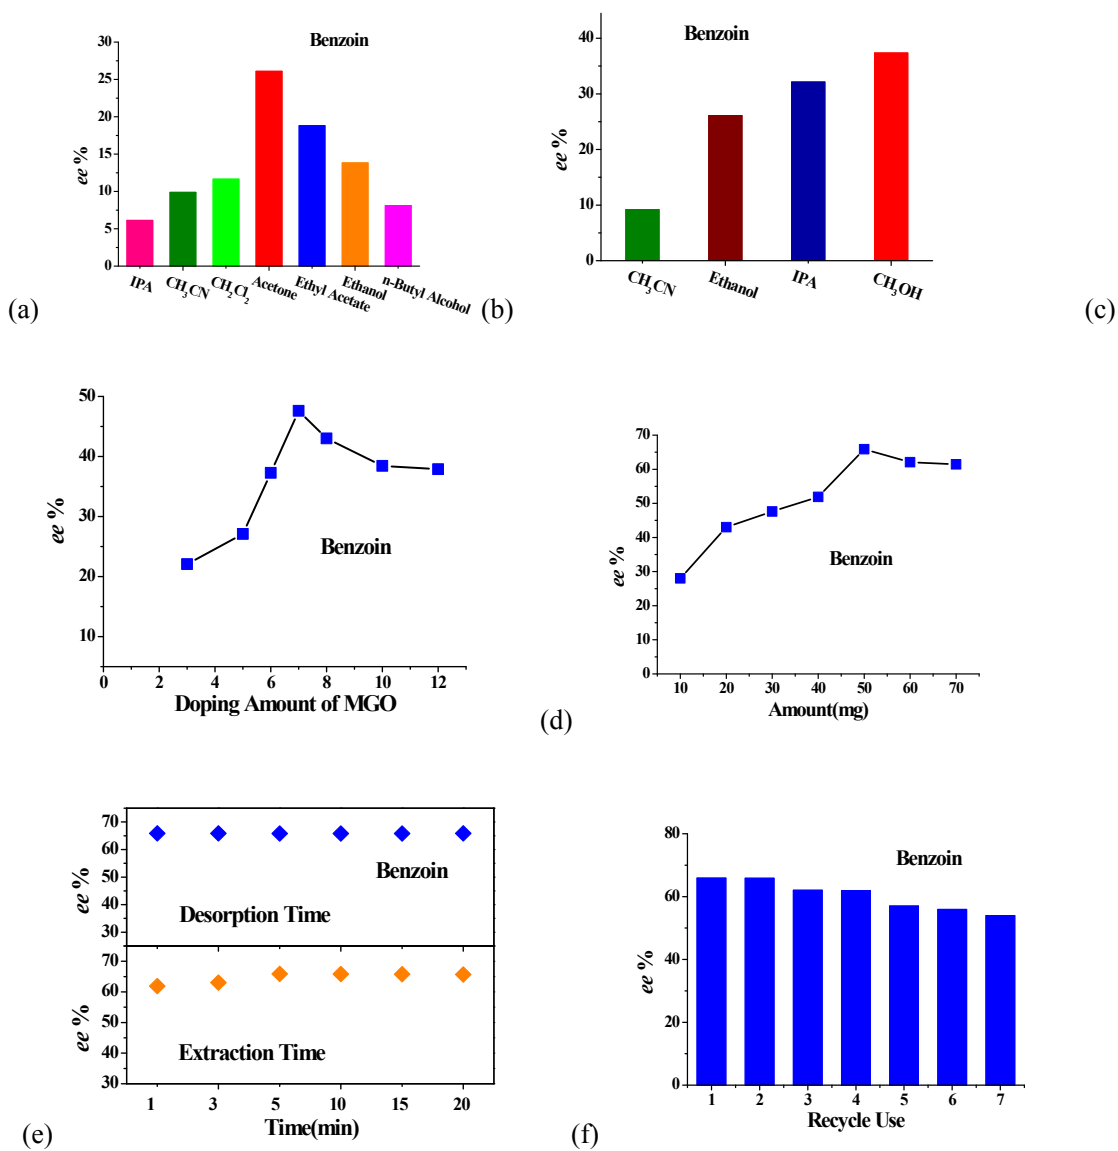

**Figure S3.** “Enantioselective capture” process for benzoin using MGO-ZnBND. (a) Optimization of the extraction solvent; (b) Optimization of the elution solvent; (c) Optimization of the percentage of MGO; (d) Optimization of the dosage of MGO-ZnBND; (e) Optimization of the extraction time and desorption time; (f) Recycle use of MGO-ZnBND composite.
